# Supplementary material
Source: MDPI journal article supplement (https://www.mdpi.com/2077-1312/12/3/496)

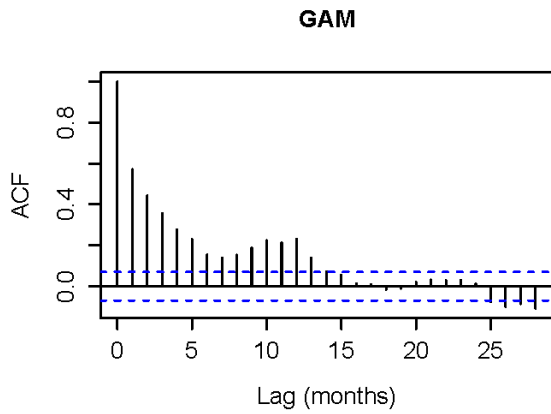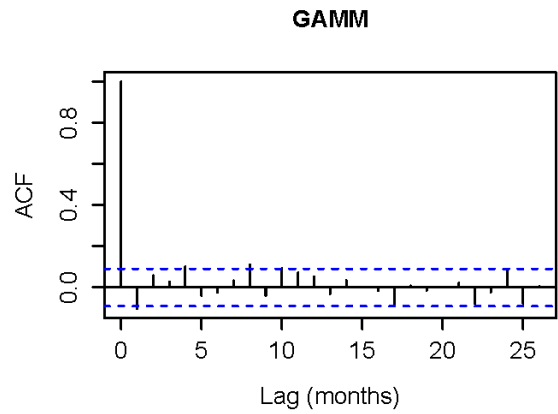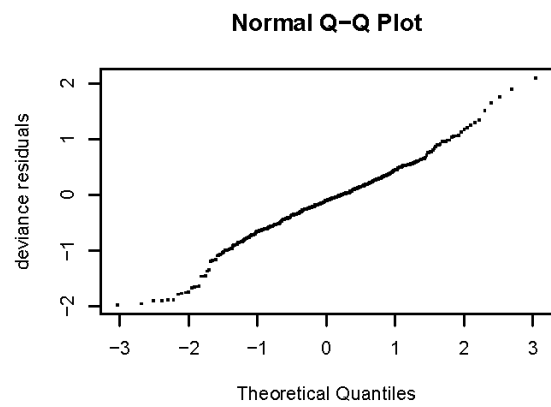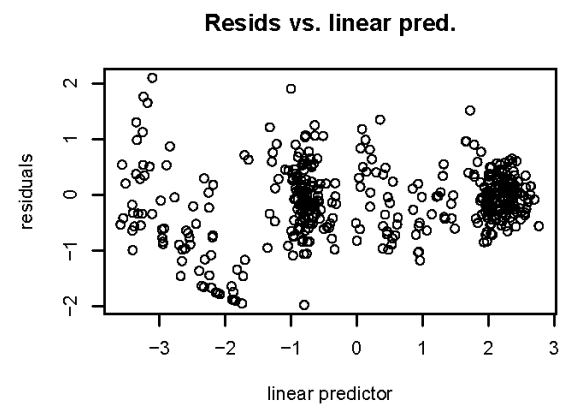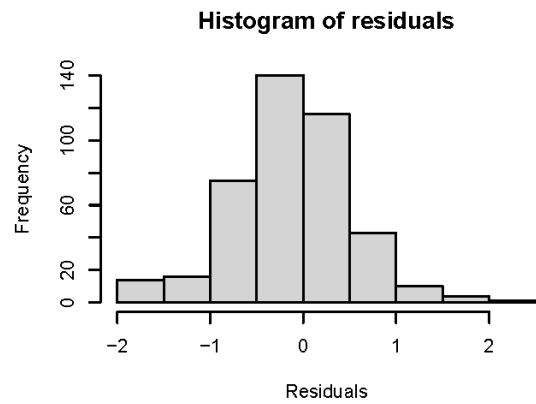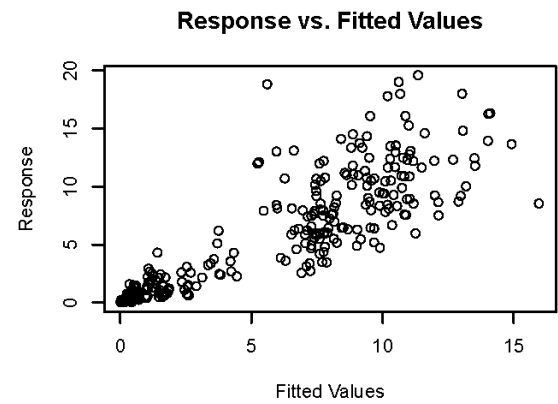

Supplementary Figure S1. Residuals of the fitted GAMM.

Supplement: s1 [file s1]
